# Supplementary material
Source: PubMed Central journal article supplement (PMC6087524)
Supplement: NIHMS984408-supplement-1.pdf [file NIHMS984408-supplement-1.pdf]

## Supplementary Material

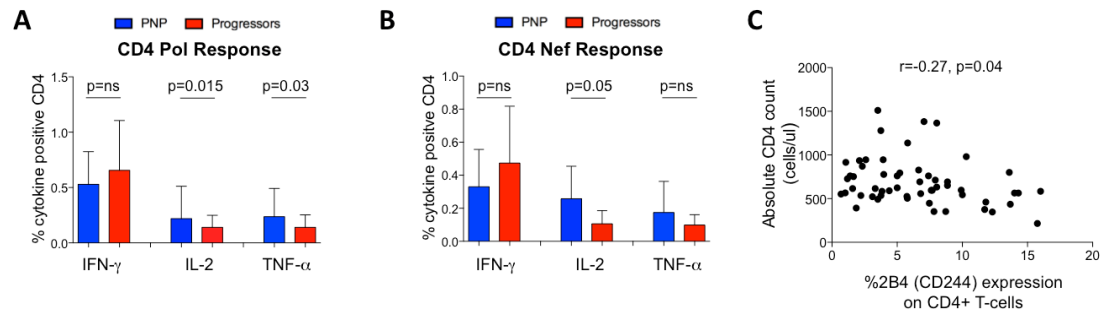

**Fig. S1. Decreased CD4 T-cell function and increased expression of exhaustion markers in pediatric progressors. a-b:** IFN- $\gamma$ , IL-2 and TNF- $\alpha$  intracellular cytokine staining (ICS) responses to Pol and Nef peptide pools in progressors (red bars, n=8) and non-progressors (blue bars, n=18). Mann-Whitney test. **c.** Increased expression of 2B4 (CD244) on CD4 T-cells in pediatric progressors. Spearman rank correlation test (n=58).

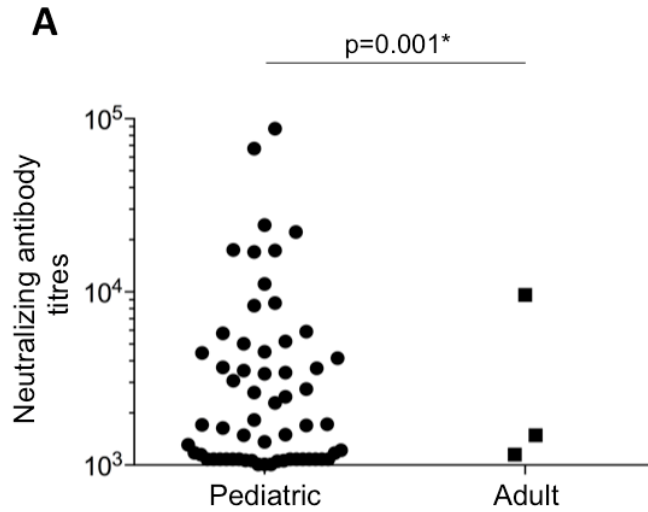

**Fig. S2. Neutralizing antibody potency in pediatric and adult subjects. a.** Among neutralizing antibody responses made to all 16 viruses by 85 pediatric and 19 adult subjects, neutralizing antibody titers of >1:1000 were observed in 4.4% versus 0.9% of tests involving pediatric versus adult samples respectively (p=0.001, Fisher's Exact test comparing frequency of neutralizing antibody titers of >1:1000 across 16 viruses).

| Generalized linear model    |                  |                         |       |         |
|-----------------------------|------------------|-------------------------|-------|---------|
| Variable                    | Beta-coefficient | 95% Confidence Interval |       | p-value |
|                             |                  | Lower                   | Upper |         |
| Log Viral load              | 3.9              | 0.676                   | 7.122 | 0.018   |
| Total breadth OLP responses | 0.81             | 0.008                   | 1.62  | 0.048   |
| Age at visit                | 1.28             | -1.03                   | 2.653 | 0.07    |
| CD4 count                   | 0.001            | -0.006                  | 0.009 | 0.749   |

**Table S1. CD8+ T-cell activation is independently associated with total breadth of HIV-specific CTL responses and viral load.** Results are shown for a generalized linear model with CD8 T-cell activation (%CD38+HLADR+ CD8 T-cells) as the dependent variable and log viral load, overlapping peptide (OLP) breadth, age and absolute CD4 count as independent variables (n=30).

| Pseudoviruses tested for neutralizing sera activity |           |           |
|-----------------------------------------------------|-----------|-----------|
| Subtype A                                           | Subtype B | Subtype C |
| Q23.17                                              | PVO.4     | Du156.2   |
| Q168.a2                                             | 6535.3    | Du172.17  |
| Q842.d12                                            | TR0.11    | CAP45.G3  |
| Q461.e2                                             | WITO.4160 | ZM197M    |
|                                                     | AC10.0.29 | CAP239.G3 |
|                                                     | QH0692.42 | ZM214M    |

**Table S2. List of pseudoviruses tested for neutralizing sera activity by HIV-1 subtype.**

## Source data for Fig 1i, 1j, 2b, 2c, 2g, 6c, 6d

**Fig 1i. sCD14 (pg/ul)**

| HIV-ve  | PNP     | Progressors |
|---------|---------|-------------|
| 1920000 | 1570000 | 2720000     |
| 2160000 | 1820000 | 2470000     |
| 2020000 | 1490000 | 2940000     |
| 3200000 | 1040000 | 4230000     |
| 4500000 | 1820000 | 4300000     |
| 1970000 | 2110000 | 4050000     |
| 2650000 | 3040000 | 2840000     |
| 1340000 | 2300000 | 1800000     |
| 2120000 | 2810000 | 2950000     |
| 912000  | 3210000 | 3110000     |
| 2000000 | 2370000 | 2930000     |
| 1220000 | 1500000 | 4650000     |
| 4620000 | 1100000 | 5360000     |
| 1700000 | 2090000 | 3530000     |
| 1590000 |         | 1730000     |
| 1530000 |         | 2530000     |
| 2360000 |         |             |
| 2260000 |         |             |
| 1810000 |         |             |
| 1960000 |         |             |
| 2320000 |         |             |

**Fig 1j. iFABP (pg/ul)**

| HIV-ve | PNP  | Progressors |
|--------|------|-------------|
| 1890   | 2067 | 671         |
| 1393   | 1256 | 4969        |
| 1689   | 3482 | 2872        |
| 2082   | 2753 | 1004        |
| 3168   | 860  | 3778        |
| 1275   | 1375 | 1391        |
| 3838   | 2448 | 2744        |
| 3067   | 1092 | 990         |
| 5286   | 1481 | 1002        |
| 3199   | 1327 | 1491        |
| 925    | 721  | 2418        |
| 710    | 933  | 1463        |
| 2253   | 681  | 3471        |
| 2691   | 754  | 3665        |
| 2953   |      | 3603        |
| 2313   |      | 3452        |
| 1519   |      | 1888        |
| 2198   |      | 2521        |
| 1366   |      | 3097        |
| 2191   |      |             |
| 649    |      |             |

**Fig 2b, SEB response (%cytokine positive CD4 T-cells)**

| non-Progressors |       |           |  | Progressors |      |           |  | HIV-negative |       |           |
|-----------------|-------|-----------|--|-------------|------|-----------|--|--------------|-------|-----------|
| IFN-gamma       | IL-2  | TNF-alpha |  | IFN-gamma   | IL-2 | TNF-alpha |  | IFN-gamma    | IL-2  | TNF-alpha |
| 1.25            | 7.72  | 6.68      |  | 2.62        | 9.35 | 7.74      |  | 1.53         | 8.60  | 2.79      |
| 1.88            | 10.32 | 4.06      |  | 1.51        | 2.65 | 1.37      |  | 0.91         | 6.10  | 0.26      |
| 2.25            | 10.48 | 1.44      |  | 1.21        | 2.17 | 2.44      |  | 1.23         | 5.06  | 3.22      |
|                 | 9.11  | 6.58      |  | 2.62        | 2.54 | 0.70      |  | 1.63         | 5.46  | 3.07      |
| 0.74            | 4.16  | 2.90      |  | 3.58        | 0.81 | 1.80      |  | 1.48         | 4.56  | 2.02      |
| 1.78            | 3.88  | 2.47      |  | 2.16        | 6.12 | 3.72      |  | 1.20         | 9.11  | 3.35      |
| 2.53            | 6.40  | 1.31      |  | 5.53        | 5.31 | 9.56      |  | 1.88         | 7.04  | 3.21      |
| 1.92            | 11.77 | 3.58      |  | 2.04        | 7.55 | 2.24      |  | 1.69         | 7.61  | 2.19      |
| 6.13            | 5.53  | 5.60      |  | 2.20        | 9.98 | 6.40      |  | 0.98         | 6.45  | 2.41      |
| 1.03            | 6.51  | 2.29      |  | 3.03        | 8.32 | 10.32     |  | 1.86         | 8.53  | 2.80      |
| 1.21            | 4.15  | 2.60      |  | 1.50        | 4.59 | 4.63      |  | 2.51         | 4.64  | 3.62      |
| 0.66            | 6.93  | 3.25      |  | 2.07        | 4.23 | 3.39      |  | 0.77         | 3.38  | 1.17      |
| 0.50            | 8.38  | 2.46      |  | 1.42        | 3.82 | 2.84      |  | 0.94         | 5.68  | 1.09      |
|                 |       |           |  | 7.67        | 2.91 | 4.50      |  | 0.59         | 4.94  | 0.85      |
|                 |       |           |  | 12.92       | 4.47 | 12.90     |  | 2.63         | 7.79  | 3.05      |
|                 |       |           |  | 1.68        | 5.82 | 3.89      |  | 2.55         | 5.90  | 1.60      |
|                 |       |           |  | 15.71       | 6.35 | 14.36     |  | 4.64         | 16.50 | 7.28      |
|                 |       |           |  | 10.36       | 7.15 | 12.85     |  | 2.63         | 9.82  | 4.14      |
|                 |       |           |  | 8.68        | 0.32 | 1.49      |  | 3.11         | 6.81  | 6.86      |
|                 |       |           |  | 15.54       | 9.91 | 16.56     |  |              |       |           |
|                 |       |           |  | 4.76        | 7.56 | 8.43      |  |              |       |           |
|                 |       |           |  | 2.69        | 4.07 | 3.85      |  |              |       |           |
|                 |       |           |  | 2.07        | 2.80 | 1.83      |  |              |       |           |
|                 |       |           |  | 1.51        | 2.06 | 0.93      |  |              |       |           |
|                 |       |           |  | 1.36        | 3.39 | 1.69      |  |              |       |           |
|                 |       |           |  | 6.83        | 3.47 | 8.10      |  |              |       |           |
|                 |       |           |  | 3.95        | 6.92 | 6.77      |  |              |       |           |
|                 |       |           |  | 5.77        | 4.77 | 4.02      |  |              |       |           |
|                 |       |           |  | 7.80        | 0.53 | 0.48      |  |              |       |           |
|                 |       |           |  | 1.52        | 3.27 | 5.83      |  |              |       |           |
|                 |       |           |  | 1.30        | 5.58 | 4.89      |  |              |       |           |
|                 |       |           |  | 1.36        | 4.27 | 2.61      |  |              |       |           |

**Fig 2c, Gag response (%cytokine positive CD4 T-cells)**

| PNP       |      |           |  | Progressors |      |           |
|-----------|------|-----------|--|-------------|------|-----------|
| IFN-gamma | IL-2 | TNF-alpha |  | IFN-gamma   | IL-2 | TNF-alpha |
| 0.43      | 0.03 | 0.02      |  | 0.55        | 0.03 | 0.01      |
| 0.76      | 0.03 | 0.03      |  | 0.33        | 0.02 | 0.03      |
| 0.04      | 0.01 | 0.53      |  | 0.30        | 0.03 | 0.02      |
| 0.03      | 0.52 | 0.45      |  | 0.03        | 0.23 | 0.03      |
| 0.56      | 0.03 | 0.01      |  | 0.03        | 0.03 | 0.28      |
| 0.45      | 0.03 | 0.61      |  | 1.90        | 0.03 | 0.10      |
| 0.63      | 0.03 | 0.03      |  | 0.84        | 0.03 | 0.02      |
| 0.00      | 0.63 | 0.54      |  | 1.12        | 0.02 | 0.12      |
| 0.34      | 1.20 | 0.88      |  | 0.57        | 0.46 | 0.02      |
| 0.54      | 0.00 | 0.18      |  | 0.95        | 0.00 | 0.03      |
| 0.65      | 0.03 | 0.30      |  | 0.62        | 0.13 | 0.03      |
| 0.63      | 0.45 | 0.03      |  |             |      |           |
| 0.02      | 0.86 | 0.02      |  |             |      |           |
| 0.07      | 0.46 | 0.63      |  |             |      |           |
| 0.74      | 0.43 | 0.03      |  |             |      |           |
| 0.34      | 0.56 | 0.03      |  |             |      |           |
| 0.88      | 0.01 | 0.04      |  |             |      |           |
| 0.43      | 0.02 | 0.34      |  |             |      |           |
| 0.56      | 0.34 | 0.56      |  |             |      |           |
| 0.04      | 0.99 | 0.45      |  |             |      |           |
| 0.44      | 0.58 | 0.03      |  |             |      |           |
| 1.07      | 0.03 | 0.03      |  |             |      |           |
| 0.04      | 0.53 | 0.05      |  |             |      |           |
| 0.35      | 0.85 | 0.45      |  |             |      |           |
| 0.02      | 0.66 | 0.35      |  |             |      |           |
| 0.44      | 0.74 | 0.02      |  |             |      |           |

**Fig 2g. The proportion of cells producing each cytokine to the total CD4 T-cell SEB response was determined (% of cells responding with each cytokine of total SEB response)**

| Tn   |           |           | Tcm  |           |           | Tem  |           |           | Temra |           |           |
|------|-----------|-----------|------|-----------|-----------|------|-----------|-----------|-------|-----------|-----------|
| IL-2 | IFN-gamma | TNF-alpha | IL-2 | IFN-gamma | TNF-alpha | IL-2 | IFN-gamma | TNF-alpha | IL-2  | IFN-gamma | TNF-alpha |
| 83.3 | 0.0       | 0.0       | 94.0 | 10.0      | 6.0       | 72.0 | 36.0      | 36.0      | 65.0  | 95.0      | 75.1      |
| 84.2 | 2.6       | 0.0       | 88.0 | 5.0       | 10.0      | 71.0 | 28.0      | 36.0      | 49.0  | 93.0      | 78.2      |
| 94.9 | 10.2      | 5.1       | 90.4 | 22.0      | 29.0      | 59.0 | 43.0      | 45.0      | 40.0  | 100.0     | 30.0      |
| 64.7 | 21.2      | 7.1       | 78.6 | 20.0      | 17.0      | 55.0 | 51.0      | 37.0      | 43.0  | 95.0      | 69.6      |
| 93.7 | 6.3       | 0.0       | 95.2 | 11.0      | 10.0      | 81.0 | 18.0      | 44.0      | 65.0  | 75.0      | 50.1      |
| 80.6 | 0.0       | 0.0       | 85.4 | 11.0      | 22.0      | 66.0 | 37.0      | 53.0      | 71.0  | 79.0      | 71.4      |
| 74.2 | 8.4       | 0.0       | 80.3 | 22.0      | 12.0      | 79.0 | 25.0      | 49.0      | 80.0  | 74.0      | 59.6      |
| 85.2 | 0.0       | 2.4       | 88.0 | 5.0       | 16.0      | 85.0 | 11.0      | 37.0      | 31.0  | 77.0      | 62.0      |
| 66.7 | 11.2      | 11.2      | 79.9 | 15.0      | 19.0      | 65.0 | 30.0      | 44.0      | 37.0  | 87.0      | 66.6      |
| 100  | 0.0       | 0.0       | 86.3 | 10.0      | 11.0      | 65.0 | 45.0      | 41.0      | 50.0  | 100.0     | 75.5      |
| 100  | 0.0       | 0.0       | 94.7 | 5.0       | 5.0       | 66.0 | 36.0      | 51.0      | 32.0  | 79.0      | 63.2      |

**Fig 6c. Viral load (c/ml)**

| PNP    | FP     |
|--------|--------|
| 76000  | 34000  |
| 25374  | 21000  |
| 12132  | 160000 |
| 8124   | 140000 |
| 13422  | 440000 |
| 175876 | 29000  |
| 13611  | 58000  |
| 41291  | 16000  |
| 144429 | 10000  |
| 18776  | 36000  |
|        | 19000  |
|        | 15000  |



**Fig 6c. CD4 T-cell count CD4 count (/mm<sup>3</sup>)**

| PNP  | FP   |
|------|------|
| 1057 | 694  |
| 1289 | 799  |
| 1223 | 1123 |
| 1646 | 576  |
| 1151 | 846  |
| 1058 | 1595 |
| 1279 | 1234 |
| 1071 | 1077 |
| 3181 | 1088 |
| 2087 | 1289 |
|      | 1604 |
|      | 1268 |

**Fig 6d. log HIV copies per million cells**

| Tn    |       | Tscm  |        | Tcm   |       | Tem   |       |
|-------|-------|-------|--------|-------|-------|-------|-------|
| PNP   | FP    | PNP   | FP     | PNP   | FP    | PNP   | FP    |
| 0.19  | 0.52  | 2     | 2.22   | 2.3   | 3.9   | 3.44  | 2.4   |
| 0.74  | 0.68  | 1.18  | 2.32   | 1.53  | 2.35  | 2.75  | 0.27  |
| 0.53  | 0.74  | 1.47  | 3.06   | 0.74  | 2.6   | 2.5   | 3.52  |
| 0.3   | 0.41  | 0.25  | 2.07   | 0.53  | 1.52  | 1.6   | 1.38  |
| 0.375 | 0.38  | 1.56  | 4.81   | 1.144 | 1.9   | 2.745 | 2.54  |
| 0.355 | 0.465 | 1.962 | 2.355  | 1.288 | 1.223 | 2.44  | 2.14  |
| 0.27  | 0.412 | 1.8   | 1.887  | 2.07  | 2.565 | 3.784 | 2.565 |
| 0.171 | 0.468 | 2.062 | 1.972  | 1.377 | 4.29  | 3.025 | 2.16  |
| 0.666 | 0.612 | 1.323 | 2.601  | 1.666 | 2.585 | 2.75  | 0.243 |
| 0.477 | 0.666 | 0.225 | 1.7595 | 2.477 | 2.86  | 1.76  | 3.168 |
|       | 0.369 |       | 4.0885 |       | 1.672 |       | 1.242 |
|       | 0.342 |       | 1.344  |       | 2.09  |       | 2.286 |
